# Supplementary material
Source: Springer Nature journal article supplement (https://www.springermedizin.de/resource/supplementary/12943_2009_568_MOESM2_ESM.pdf/9554990)

# Proliferation

**A**

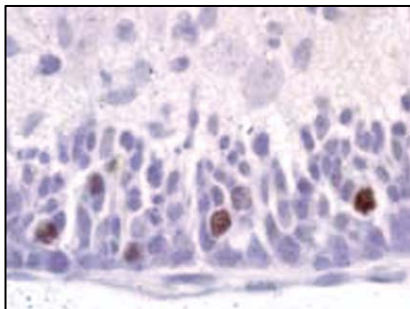

**B**

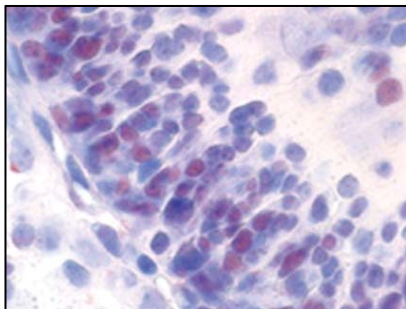

**C**

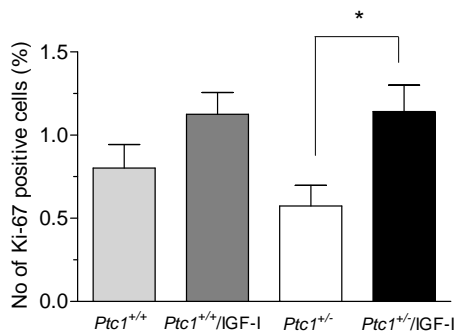

**D**

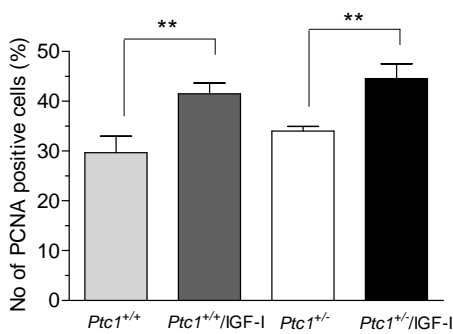

**E**

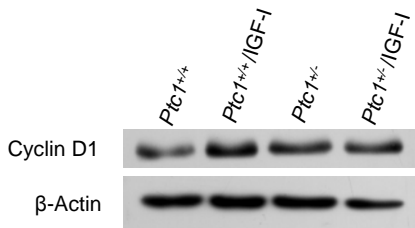

**F**

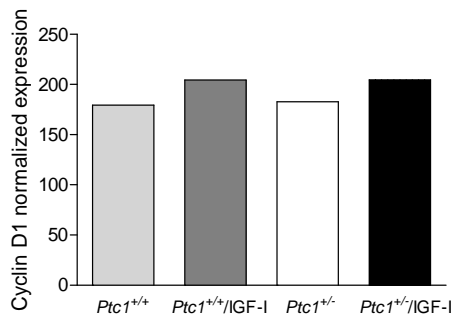

# Programmed cell death

**G**

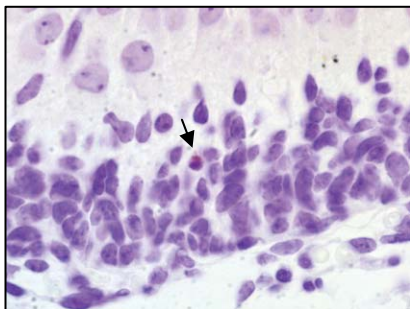

**H**

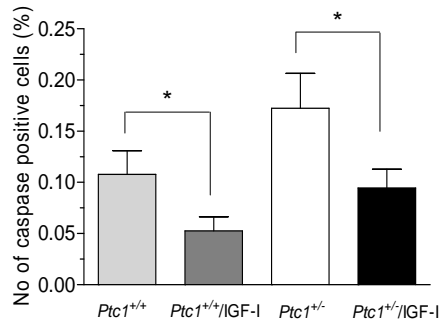

Supplement: MOESM2 [file 9554990]
